# Supplementary material
Source: PubMed Central journal article supplement (PMC10074108)
Supplement: EMBR-24-e55548-s003.pdf [file EMBR-24-e55548-s003.pdf]

## Expanded View Figures

### Figure EV1. Active RET leads to increased ROS and decreased NAD<sup>+</sup>/NADH ratio in aged flies.

- A, B Mito-Sox staining (A) and data quantification (B) showing mitochondrial ROS level in different aged fly brains with or without treatment with the indicated RET inhibitors ( $n = 5$  per group).
- C Quantification of NAD<sup>+</sup>/NADH ratio in young flies, old flies, and old flies treated with the indicated chemicals.
- D Western blot analysis comparing NDUFS3 level in young and aged flies.  $**P < 0.01$  in Student's  $t$ -test.
- E Quantification of FET-ROS in isolated mitochondria purified from aged wild-type flies and assayed under FET condition without or with treatment at the indicated concentrations of CPT ( $n = 4$ ).
- F Quantification of NAD<sup>+</sup>/NADH ratio in isolated mitochondria after induction of FET and with or without CPT (2.5  $\mu$ M) treatment ( $n = 4$ ).
- G Co-immunoprecipitation assay showing the effect of aging and CPT treatment on the various protein–protein interactions between C-I proteins involved in RET.
- H Quantification of ROS level from brain samples of DES and DES + CPT-treated flies ( $n = 4$ ).
- I Quantification of NAD<sup>+</sup>/NADH ratio from brain samples of DES and DES + CPT-treated flies ( $n = 5$  sets, 20 flies per set).
- J Quantification of NAD<sup>+</sup> and NADH levels measured with SoNar in different aged fly brains with or without treatment with the indicated chemicals as shown in Fig 1D ( $n = 4$  sets, 5 flies per set).
- K Quantification of NAD<sup>+</sup>/NADH ratio in wild-type flies treated with CPT or co-treated with CPT and NADH ( $n = 4$  sets, 20 flies per set).
- L Mitochondrial C-I activity assay using mitochondria purified from different aged flies ( $n = 3$ ).
- M In-gel activity assays of respiratory complexes using mitochondria purified from different aged flies.

Data information: Data are representative of at least three repeats. Data are shown as mean  $\pm$  SEM. Asterisks indicate statistical significance ( $**P < 0.01$ ) in single-factor ANOVA with Scheffe's analysis as a *post hoc* test.

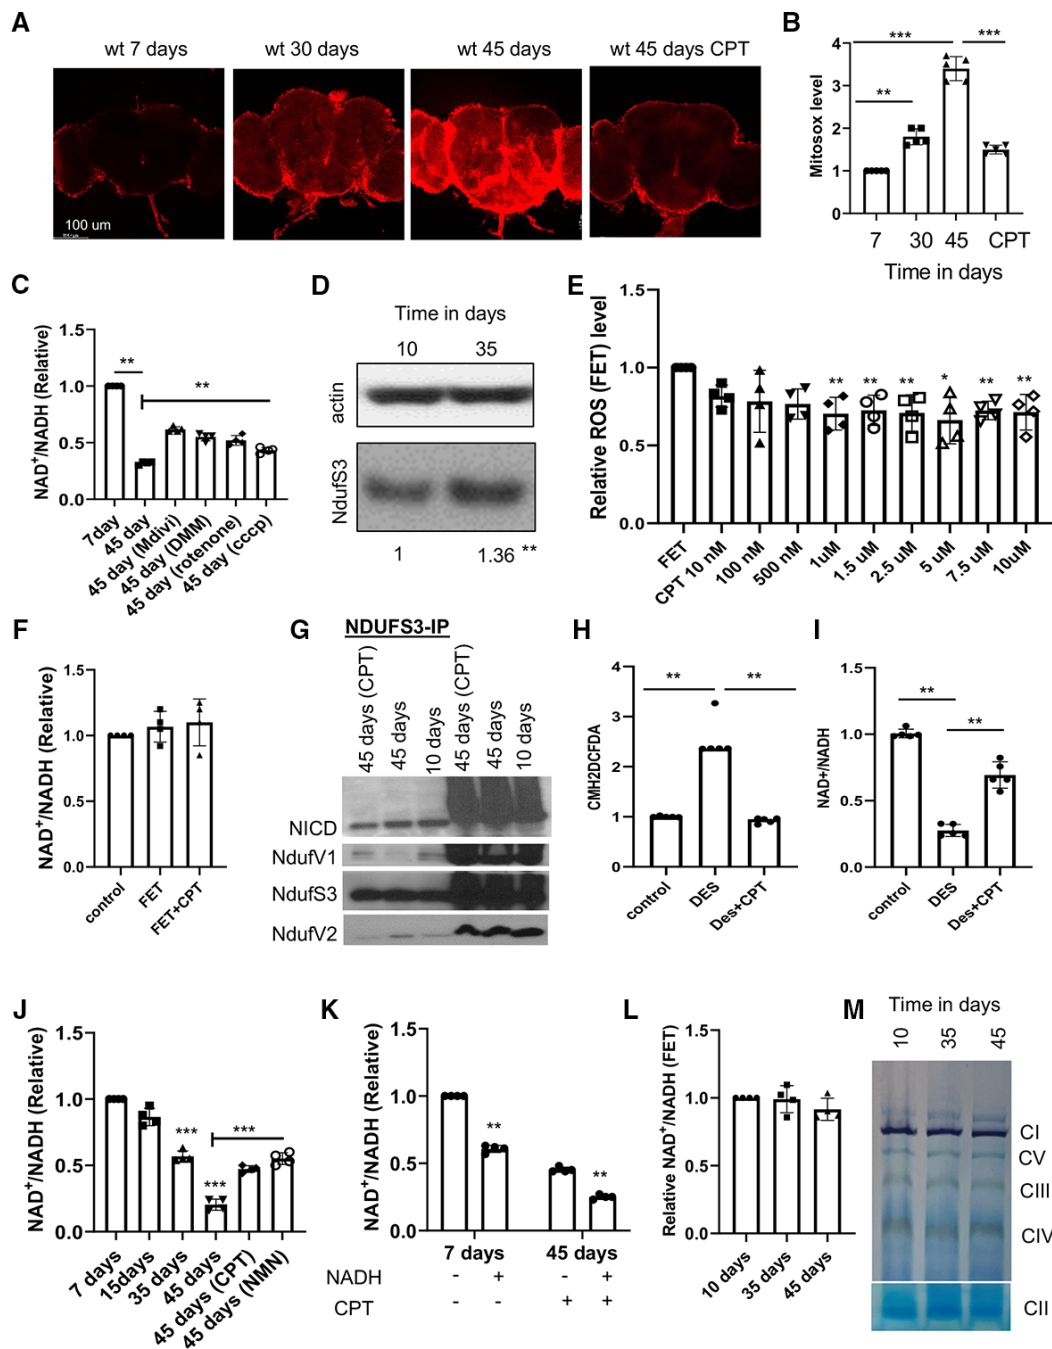

Figure EV1.

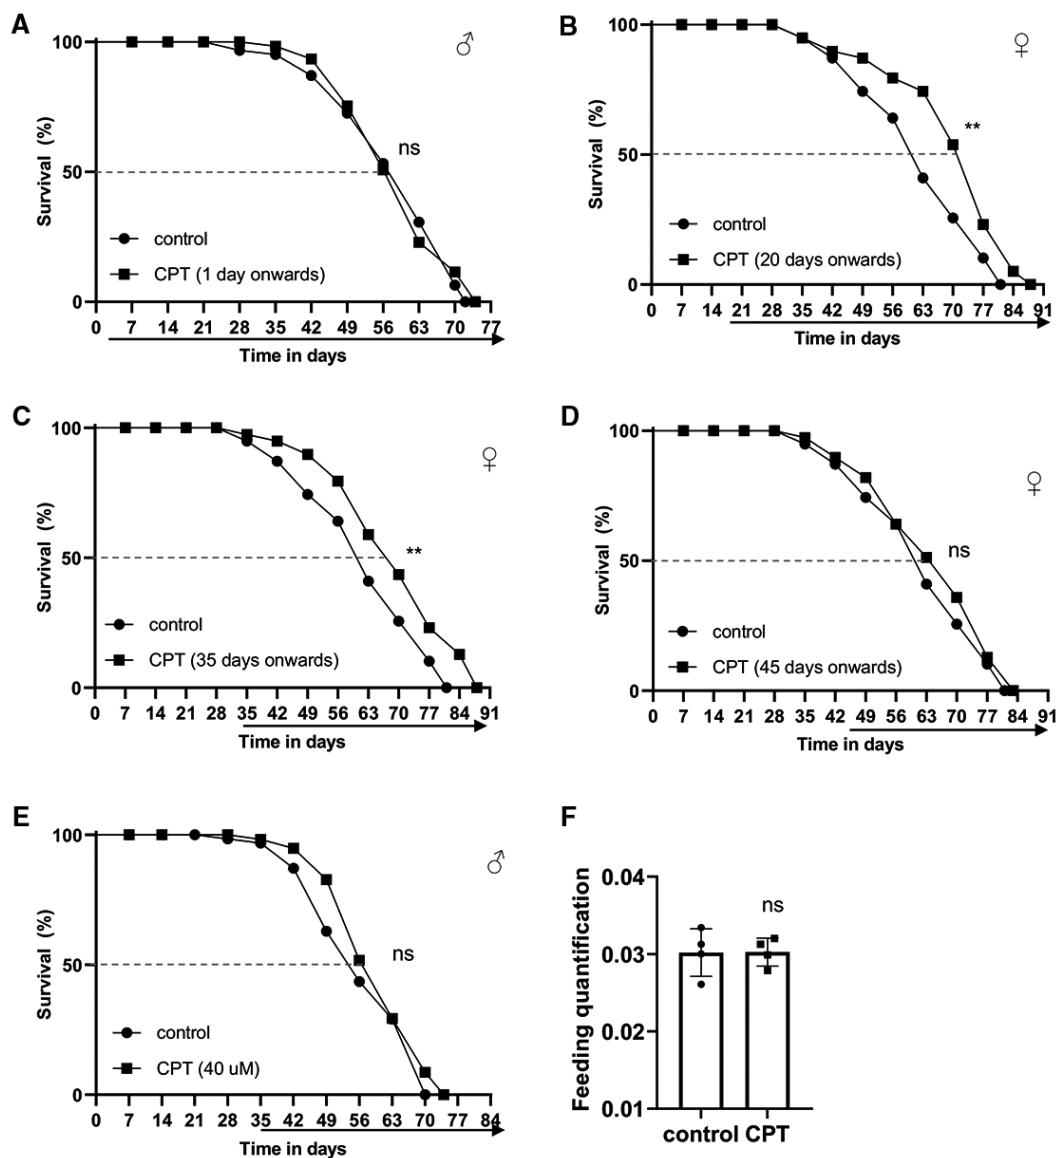

**Figure EV2. Inhibition of RET by CPT treatment extends *Drosophila* lifespan.**

**A** Survival curves comparing control flies and flies fed with food containing 10  $\mu$ M CPT from day 1 onwards.

**B–D** Survival curves comparing overall survival (by logrank test) and maximum lifespan (by Wang–Allison test) of control flies and flies fed with food containing 10  $\mu$ M CPT from 20 days (\*\* $P < 0.001$  logrank, \*\* $P < 0.001$  Wang–Allison) (B), 35 days (\*\* $P < 0.001$  logrank, \*\* $P < 0.001$  Wang–Allison) (C), and 45 days (ns) (D) onwards ( $n = 3$  groups, 20–25 flies per group).

**E** Survival curves comparing control flies and flies fed with food containing 40  $\mu$ M CPT from 35 days onwards (ns;  $n = 3$  groups, 20–25 flies per group).

**F** Quantification of food consumption in control and CPT-fed flies ( $n = 4$  groups, 20 per group).

Data information: Data are representative of at least three repeats. Data are shown as mean  $\pm$  SEM in (F). Survival curves were analyzed with logrank test along with Wang–Allison test for maximum lifespan. Dashed lines mark time points of 50% survival. Asterisks indicate statistical significance (\*\* $P < 0.01$ , ns: not significant) in single-factor ANOVA with Scheffé's analysis as a *post hoc* test.

**Figure EV3. Inhibition of RET by genetic manipulation of C-I subunits extends fly lifespan.**

- A, B Survival curves of control flies and flies with NDUFS2 (A), or NDUFS3 (B) knocked down in neurons ( $n = 3$  groups, 20–25 flies per group).
- C Quantification of food consumption in flies treated with CPT or NMN.
- D Quantification of Smurf assay data in young flies, old flies, and old flies treated with CPT and NMN ( $n = 3$  groups, 20 flies per group).
- E–I Survival curves showing the lifespan effect of CPT in combination with NMN (E) (control vs NMN:  $**P < 0.01$  logrank,  $**P < 0.01$  Wang Allison; CPT vs CPT + NMN, ns), mito-Tempo (F) (control vs mito-Tempo:  $**P < 0.01$  logrank,  $**P < 0.01$  Wang Allison; CPT vs CPT + mito-Tempo: ns), melatonin (G) (control vs melatonin:  $**P < 0.01$  logrank,  $**P < 0.01$  Wang Allison; CPT vs CPT+ melatonin: ns), FK866 (H) (control vs FK866:  $**P < 0.01$  logrank,  $**P < 0.01$  Wang Allison; FK866 vs FK866 + CPT: ns), and paraquat (I) (control vs paraquat:  $**P < 0.01$  logrank,  $**P < 0.01$  Wang Allison; paraquat vs paraquat+CPT: ns) ( $n = 3$  groups, 20 flies per group).

Data information: Data are representative of at least three repeats. Data are shown as mean  $\pm$  SEM in (C, D). Survival curves were analyzed with logrank test along with Wang–Allison test for maximum lifespan. Dashed lines mark time points of 50% survival. Asterisks indicate statistical significance ( $**P < 0.01$ ) in single-factor ANOVA with Scheffe's analysis as a *post hoc* test.

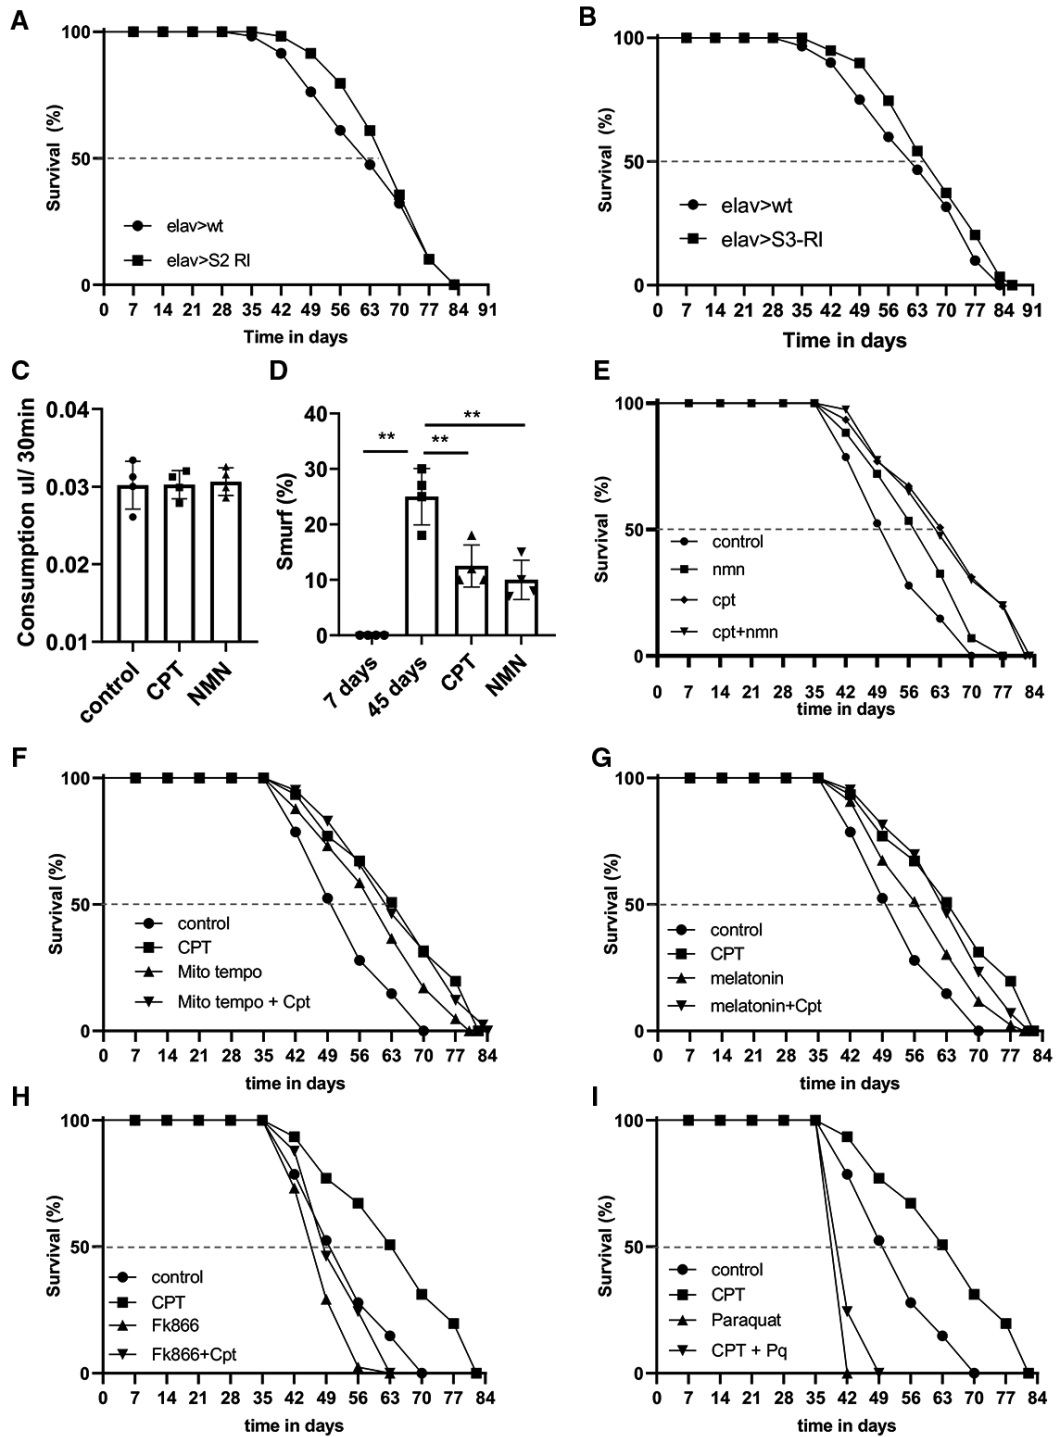

Figure EV3.

**Figure EV4. Lifespan effect of RET inhibition by CPT is mediated by Sirtuin, Foxo, and autophagy pathways.**

- A, B Immunoblots showing the effect of aging on dFoxo acetylation (A), and effect of CPT treatment on dFoxo acetylation (B). dFoxo was immunoprecipitated from whole fly extracts and detected with anti-acetyl-K antibody.
- C RT-PCR analysis of levels of the indicated transcripts in aged flies relative to young flies.
- D Images and data quantification showing p62 staining in the brain of old flies and old flies treated with CPT ( $n = 5$  per group).
- E–I Survival curve showing the effect of NMN on lifespan in control (*Mhc > wt*) flies (\*\* $P < 0.01$ , logrank) (E), and NDUFS3-RNAi (F), Foxo-RNAi (\*\* $P < 0.01$ , logrank) (G), Sirt-2-RNAi (H), and ATG1-RNAi (\*\* $P < 0.01$ , logrank) (I) flies ( $n = 3$  groups, 20 flies per group).

Data information: Data are representative of at least three repeats. Data are shown as mean  $\pm$  SEM in (C, D). Survival curves were analyzed with logrank test along with Wang–Allison test for maximum lifespan. Dashed lines mark time points of 50% survival. Asterisks indicate statistical significance (\*\*\* $P < 0.001$ , \*\* $P < 0.01$ , \* $P < 0.05$ ) in single-factor ANOVA with Scheffe's analysis as a *post hoc* test.

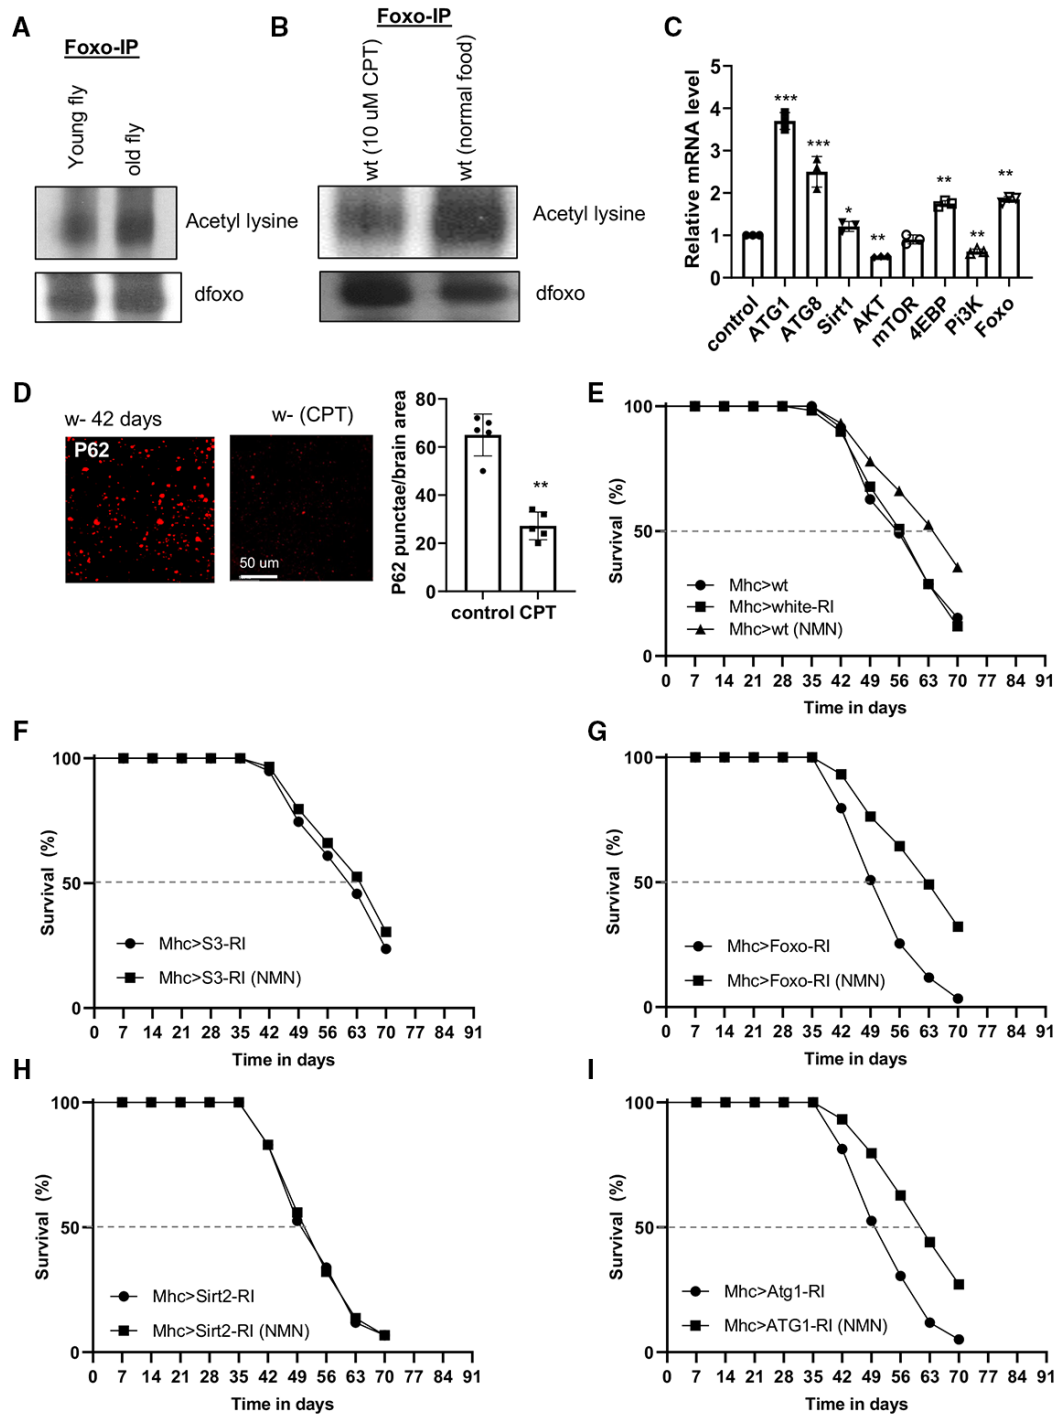

Figure EV4.

**Figure EV5. Inhibition of RET rescues disease phenotypes of fly AD models.**

- A Staining images and data quantification showing the effect of CPT on ROS level in the brain of *elav > APP.BACE* flies ( $n = 3$  set, 5 brains per set).
- B Immunofluorescence images and data quantification showing the effect of CPT on mitochondrial morphology in DA neurons of *TH > APP.C99* flies co-expressing a mito-GFP reporter ( $n = 5$  brains per group).
- C Immunofluorescence images showing the effect of CPT treatment on lysosomal morphology in the muscle of *Mhc > APP.C99* flies.
- D Immunofluorescence images showing the effect of CPT treatment on DA neuron number in the PPL1 cluster of *elav > APP.BACE* fly brain.
- E, F Immunostaining showing the effect of NDUFS3-RNAi on 6E10-positive amyloid (E) and ubiquitin- and p62-positive protein aggregates (F) in the muscle of *Mhc > APP.C99* flies.
- G Quantification of the effect of AOX or NMNAT overexpression on wing posture in *Mhc > APP.C99* flies ( $n = 4$  groups, 20 flies per group).
- H Immunoblots showing the effect of AOX or NMNAT overexpression on aberrant APP.C99 translation products in *Mhc > APP.C99* flies.
- I Quantification of the effect of dFoxo overexpression on wing posture in *Mhc > APP.C99* flies ( $n = 4$  groups, 20 flies per group).

Data information: Data are representative of at least three repeats. Data are shown as mean  $\pm$  SEM. Asterisks indicate statistical significance (\*\* $P < 0.001$ , \*\* $P < 0.01$ ) using single-factor ANOVA with Scheffe's analysis as a *post hoc* test.



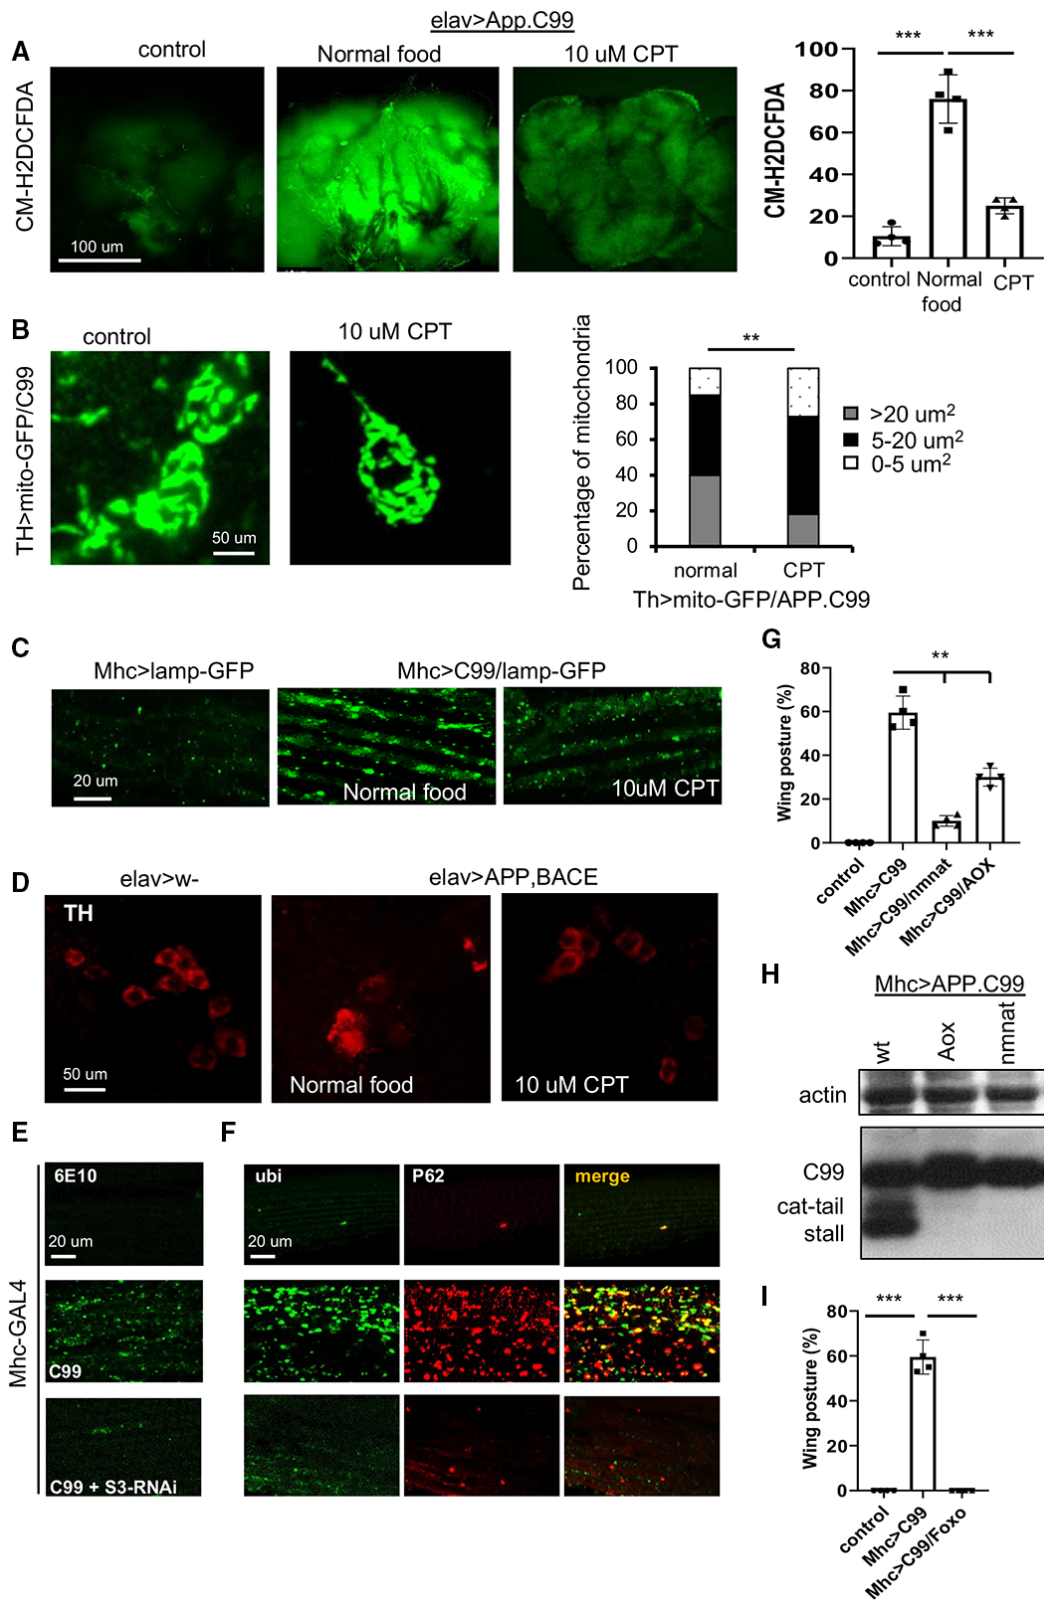

Figure EV5.
